# Supplementary material
Source: PubMed Central journal article supplement (PMC9272295)
Supplement: 10-1055-s-0041-1729980-s200255.pdf [file 10-1055-s-0041-1729980-s200255.pdf]

**Supplementary Table S1** Outpatient endocrine follow-up patterns

| Reason                   | n   | Endocrine follow-up |             |             | p-Value |
|--------------------------|-----|---------------------|-------------|-------------|---------|
|                          |     | Institution         | Private     | None        |         |
| Nonreadmitted            | 352 | 126 (35.8%)         | 122 (34.7%) | 104 (26.6%) | 0.565   |
| All readmitted           | 57  | 20 (30.1%)          | 12 (21.1%)  | 25 (43.9%)  | 0.510   |
| Medical causes           | 33  | 13 (39.4%)          | 5 (15.2%)   | 15 (45.5%)  | 0.570   |
| Surgical causes          | 25  | 8 (32.0%)           | 8 (32.0%)   | 9 (36.0%)   | 0.872   |
| Cerebrospinal fluid leak | 14  | 6 (42.9%)           | 4 (28.6)    | 4 (28.6%)   | 0.849   |
| Epistaxis                | 11  | 2 (18.2%)           | 4 (36.4%)   | 5 (45.5%)   | 0.425   |
| Hyponatremia             | 17  | 6 (35.3%)           | 4 (23.5%)   | 7 (42.2%)   | 0.611   |
| Hypernatremia            | 5   | 2 (40.0%)           | 1 (20.0%)   | 2 (40.0%)   | 0.989   |
| Pain/headache            | 16  | 6 (37.5%)           | 2 (12.5%)   | 8 (50.0%)   | 0.142   |
| Adrenal insufficiency    | 5   | 2 (40.0%)           | 2 (40.0%)   | 1 (20.0%)   | 0.822   |

Note: Values are presented as number (%) unless otherwise indicated.
